# Supplementary material
Source: Research Square preprint supplement (doi:10.21203/rs.3.rs-10004662/v1)
Supplement: Supplementary file 1 [file 8da20fd0a0d939796baa054c.pdf]

1 **Supplementary Materials for**

2

3 **Stretchable Electronics for Extreme Environments:**

4 **Ceramic Aerogel Metamaterials Enable High-temperature Sensing**

5

6 Chao Hou<sup>1,2,†</sup>, Zijian Xu<sup>1,2,†</sup>, Yunzhao Bai<sup>1,2,3,†</sup>, Wenna Cheng<sup>1,2</sup>, Li Yuan<sup>1,2</sup>, Ying Lyu<sup>1,2</sup>,  
7 Hongwei Xie<sup>1,2</sup>, Xuanyu Wu<sup>1,2</sup>, Qintao He<sup>1,2</sup>, Jinghui Ling<sup>1,2</sup>, Jinyu Pan<sup>1,2</sup>, Wei He<sup>1,2</sup>, Yichen  
8 Liu<sup>1,2</sup>, Yanchen Zhu<sup>1,2</sup>, Yunlei Zhou<sup>4</sup>, Yinji Ma<sup>5,6</sup>, Mingchao Liu<sup>7</sup>, Yao Zhang<sup>1,8</sup>, Zhouping  
9 Yin<sup>1,2,\*</sup>, Norman A. Fleck<sup>9,\*</sup>, YongAn Huang<sup>1,2,\*</sup>, Kan Li<sup>1,2,\*</sup>

10

11 Corresponding author: yinzhp@hust.edu.cn (Z.P.Y.); naf1@cam.ac.uk (N.A.F.);  
12 yahuang@hust.edu.cn (Y.A.H.); kanli@hust.edu.cn (K.L.)

13

14 **The PDF file includes:**

15 Supplementary Notes

16 Supplementary Tables S1 to S2

17 Supplementary Movies S1 to S3

18 References (1–79)

19

20

21

## Supplementary Notes

22

### Supplementary Note 1: 2D Random Fiber Mechanical Model of CAMs

23

24

25

26

27

28

We constructed the randomly distributed ceramic fiber structure (Extended data fig.3) based on a modified Kagome/triangular lattice to replicate the microstructure of electrospun ceramic aerogel membranes. The initial base lattice consists of circumferentially arranged fibers with a fixed inter-fiber angle of  $120^\circ$ . Each fiber is randomly rotated within limits of  $\pm\alpha$  where  $\alpha$  takes selected values from  $10^\circ$  to  $30^\circ$ , where  $\alpha = 30^\circ$  implies no preferred orientation. The random distribution of electrospun nanofibers observed by SEM is characterized by  $\alpha \geq 25^\circ$ .

29

30

31

32

33

34

A non-periodic square computational domain is adopted, with a side length 20 times the fiber spacing of the original Kagome lattice. This setup provides a sufficiently large representative volume element to capture the statistical randomness of the fiber network and avoid artificial stress artifacts induced by periodic boundary conditions. Our finite element model does not employ periodic unit cells; instead, the non-periodic representative volume element is used to faithfully reproduce the actual random distribution of electrospun fibers.

35

36

37

38

39

40

41

Euler–Bernoulli beam theory is adopted to describe the mechanical behavior of individual fibers, and the overall network is established as a 2D random fiber framework. The number of cross-over nodes on each fiber depends on the fiber density within the representative unit, and each fiber contains far more than two cross-over junctions. Notably, the fiber nodes on the boundary of the computational domain are not necessarily the physical free ends of fibers, and these boundary nodes are specially reserved for load application. Accordingly, it is inappropriate to simply treat these boundary fiber segments as unloaded free ends.

42

43

44

45

46

47

48

49

50

51

52

53

54

55

56

57

58

59

All parameters involved in the theoretical mechanical models are uniformly defined as follows:  $\sigma_{\max}$  denotes the ultimate tensile stress of the fibrous membrane;  $K$  is the spring coupling coefficient related to force  $RF_1$  and deformation  $U_1$  at fiber cross-junctions, which characterizes the interfacial bonding strength and load-transfer capability of the network;  $E$  represents the intrinsic Young's modulus of the fiber matrix, and  $A$  refers to the cross-sectional area of a single fiber.  $d$  and  $L$  correspond to the average fiber diameter and length, and  $l$  defines the average internodal spacing between adjacent fiber intersection points.  $\bar{\rho}$  is the relative density of the monolayer random fibrous network;  $E_{\text{eff}}$  and  $G_{\text{eff}}$  stand for the in-plane effective elastic and shear modulus of the fibrous network;  $B$  is a dimensionless constant determined by network topology;  $C$  and  $b$  are topology-dependent structural constants, where  $b$  gradually approaches 1 with the increase of fiber randomness.  $\varepsilon_{\max}$  defines the fracture strain of fiber-derived membrane materials. For serpentine architectures,  $\varepsilon_{\text{app}}$  is the macroscopic applied tensile strain;  $w$  is the structural width,  $R$  is the curvature radius of curved segments,  $\alpha$  is the fiber random rotation angle ( $0^\circ \leq \alpha \leq 30^\circ$ ),  $\theta$  is the wrap angle of serpentine curved segments ( $180^\circ \leq \theta \leq 210^\circ$ ), which determines the geometric deformation limit of the structure.  $g_1$  and  $g_2$  are configuration-related fitting parameters,  $G$  is a structural configuration-dependent combined coefficient, and  $t$  is the thickness of the fibrous membrane.  $\varepsilon_{\text{local}}$  represents the intrinsic local strain of the fiber matrix;  $\varepsilon_{\text{ribbon}}^f$  and  $\varepsilon_{\text{mem}}^f$  indicate the intrinsic ultimate tensile strain of narrow ribbon specimens and

60 large-area intact membranes, respectively, while  $w_{cr}$  is the critical characteristic width governing  
61 the size-dependent mechanical behavior.

62 To precisely control the average fiber length  $L$ , a random breakpoint generation method was  
63 introduced: when the continuous length of a single fiber exceeded  $N$  times the average node  
64 spacing  $l$  (where  $l$  is the mean value of local node spacing  $l_i$ ), random breakpoints were  
65 automatically generated along the fiber length. This strategy strictly controls the  $L/l$  (the ratio of  
66 fiber segment length to average node spacing) and simulates the random fiber segment morphology  
67 of actual ceramic aerogel membranes.

68 We investigated the in-situ tensile deformation of ceramic nanofiber membranes via scanning  
69 electron microscopy (Extended data fig.3a-b). In-situ observations reveal that the fibers remain  
70 structurally stable without obvious sliding prior to reaching the maximum tensile strain, while  
71 pronounced fiber slippage—rather than intrinsic fiber fracture—occurs in the fractured regions  
72 after the peak stress is reached. This characteristic deformation behavior indicates that the tensile  
73 strength of the nanofiber membrane is dominated by the coupling strength at the fiber cross nodes.  
74 To quantify this nodal coupling effect, a spring coupling coefficient  $K$  is incorporated at the fiber  
75 cross nodes in our model to characterize the bonding strength and load-transfer efficiency between  
76 intersecting fibers. Thus, the corresponding effective stress could be expressed as:

$$77 \quad \sigma_{\max} \propto Kl/EA \quad (S1)$$

78 where  $E$  denotes the fiber Young's modulus and  $A$  the fiber cross-sectional area. Surely,  $\sigma_{\max}$  is  
79 the macroscopic strength of the lattice. It is a function of  $Kl/EA$ , approximately linear when the  
80 fiber length is less than the boundary length of the RVE and  $Kl/EA < 0.01$  (Extended data fig.3g-  
81 i). By adjusting electrospinning parameters, we fabricate membranes with varied fiber diameters,  
82 node spacings, and areal densities, which show distinct tensile stress-strain responses. The relative  
83 density of single-layer random fibers can be expressed as<sup>64</sup>:

$$84 \quad \bar{\rho} = \frac{Bd}{l} \quad (S2)$$

85 where  $d$  is the average fiber diameter,  $l$  is the average fiber internodes spacing and  $B$  is a constant  
86 based the network topology. Assuming that the fiber material exhibits linear elasticity and the fiber  
87 cross-points are rigidly connected ( $Kl/EA = \infty$ ), the effective in-plane elastic modulus of the  
88 periodic Kagome two-dimensional network depends on the relative density and can be predicted  
89 as follows<sup>65</sup>:

$$90 \quad E_{\text{eff}} = CE\bar{\rho}^b \quad (S3)$$

91 where  $b$  and  $C$  are constants based the network topology. Therefore, the failure strain of aerogel  
92 membrane with the same fiber-node coupling coefficient can be expressed as:

$$93 \quad \varepsilon_{\max} = \frac{\sigma_{\max}}{E_{\text{eff}}} \propto \frac{l}{d} \quad (S4)$$

94 Systematic analysis of the stress-strain curves of KAGOME structures with different rotation  
95 angles and breakpoint settings identified core mechanical responses (Extended data fig.4a). The

96 tensile stress of the fiber network increased with the rise of coupling coefficient  $Kl/EA$ . The pure  
97 KAGOME lattice at  $\alpha = 25^\circ$  exhibited a distinct buckling stress inflection point. This inflection  
98 point disappeared at  $\alpha \geq 25^\circ$  and the stress-strain curve became more linear, consistent with the  
99 mechanical behavior of actual random electrospun fiber membranes. Statistical analysis of the  
100 modulus ratio and areal density (Extended data fig.3i) showed the parameter  $b$  in Equation (S3)  
101 gradually approached 1 with increasing  $\alpha$ . This trend indicates the fiber network evolved into an  
102 isotropic random structure.

103 The effect of length  $L$  and spacing  $l$  of fibers was investigated. In this model, fibers with a length  
104 greater than  $L$  are split into two segments by a randomly generated breakpoint. The tensile stress  
105 of the fiber network decreased with shortened fiber segments, enabling uniform strain dispersion  
106 and weakening the load-transfer path of single fiber segments. These results confirm the ductility  
107 and tensile strength of the fiber membrane can be regulated by adjusting the average fiber length  
108  $L$  via breakpoint number and tuning the node coupling coefficient  $K$ . The proportion of fibers with  
109 true strain exceeding 0.5% increased with rising  $Kl/EA$  and  $L/l$  (Extended data fig.4i-k). The  
110 experimental tensile strain of the ceramic fiber membrane was approximately 2.5%. Simulation  
111 results with stress-strain curves matching experimental values were selected. The fiber network  
112 underwent macroscopic fracture when the proportion of fibers with true strain over 0.5% reached  
113 approximately 30%. This proportion was therefore defined as the fracture critical characteristic of  
114 the simulation. Critical stress-strain eigenvalues under different parameters were extracted  
115 (Extended data fig.4b-e). A smaller  $L/l$  led to superior membrane extensibility with fracture stress  
116 largely unchanged. In contrast, increasing  $Kl/EA$  strengthened the fiber-node coupling coefficient,  
117 significantly enhancing the fracture stress of the fibrous membrane with a slight reduction in  
118 fracture strain.

119 Simulation conclusions were verified with ceramic fiber membrane pretreatment experiments,  
120 further confirming the dual regulation mechanism of the membrane's mechanical performance  
121 (Extended data fig.2). Oxygen plasma treatment was applied to ceramic fiber membranes and  
122 effectively achieved fiber segment breakage, equivalent to reducing the  $L/l$  ratio in the simulation  
123 model. According to simulation-derived laws, a lower  $L/l$  significantly improved the fracture  
124 strain of the fiber membrane, thus enhancing the ductility of the ceramic aerogel membrane. A  
125 moisturizing treatment was also conducted and strengthened the bonding strength at fiber cross  
126 nodes, corresponding to an increased  $Kl/EA$  ratio in the simulation model (Extended data fig.4e).  
127 A higher  $Kl/EA$  led to a significant increase in membrane fracture stress with a slight, eventually  
128 stabilized reduction in ductility. This result improved the tensile strength of the ceramic aerogel  
129 membrane without obvious loss of deformability.

Supplementary Note 2: Stretchable Metamaterial Design and Size Effect of CAMs

To further enhance the stretchability of ceramic nanofiber membranes, we introduced a serpentine metamaterial architecture, which is widely utilized in stretchable electronics. In the case of the serpentine architecture considering in-plane deformation, the correlation between the actual strain and the loading strain is given by<sup>48</sup>:

$$\frac{\varepsilon_{\max}}{\varepsilon_{\text{app}}} = \frac{\frac{w}{R} \left[ \frac{12}{2 - \frac{w}{R}} + \left( \frac{12}{2 - \frac{w}{R}} - \frac{w}{R} \right) \left( \sin\alpha + \frac{l}{2R} \cos\alpha \right) \right] \left( \cos\alpha - \frac{l}{2R} \sin\alpha \right)}{\left[ \cos^2\alpha \left( \frac{l^3}{2R^3} + 3 \left( \frac{\pi}{2} + \alpha \right) \frac{l^2}{R^2} + 12 \frac{l}{R} - 12 \left( \frac{\pi}{2} + \alpha \right) \right) + \sin 2\alpha \left( 6 \left( \frac{\pi}{2} + \alpha \right) \frac{l}{R} + 9 \right) \right] + \frac{w^2}{R} \left[ \left( \frac{\pi}{2} + \alpha \right) \left( \frac{l}{2R} \cos\alpha + \sin\alpha \right)^2 + \frac{l}{2R} \left( \sin^2\alpha + \frac{3E_{\text{eff}}}{2G_{\text{eff}}} \cos^2\alpha \right) \right] + 18 \left( \frac{\pi}{2} + \alpha \right)} \quad (\text{S5})$$

When out-of-plane deformation is considered, the correlation between the actual strain and the applied strain for the serpentine architecture is given as follows<sup>47,66</sup>:

$$\varepsilon_{\max} = g_1 \sqrt{\varepsilon_{\text{app}}} \frac{t}{2R} + g_2 \varepsilon_{\text{app}}^2 \frac{w}{2R} \quad (\text{S6})$$

The serpentine structure accounts for both in-plane and out-of-plane deformation, as described in equation (S6). We fitted this formula to experimental tensile data of samples with different widths, and found that the coefficient  $g_1$  approaches 0. This allows us to simplify the strain correlation to:

$$\varepsilon_{\text{app}} = \sqrt{\frac{\varepsilon_{\text{local}} R}{G w}} \quad (\text{S7})$$

where  $G$  is a combined structure-dependent coefficient, explicitly highlighting the width-to-radius ratio ( $w/R$ ) as a critical parameter governing the stretchability of the serpentine architecture.

We then investigated the size effect of the ceramic fiber membrane's intrinsic tensile capacity with respect to sample width, and found a strong dependence on the cutting method. Laser-cut fiber membranes preserve ductility at much smaller widths compared to blade-cut samples, which is beneficial for the design and fabrication of large-stretch structures. Based on experimental tensile results, we fitted the relationship between the intrinsic maximum tensile strain and sample width for both cutting methods:

$$\varepsilon_{\text{ribbon}}^f = \varepsilon_{\text{mem}}^f \left( 1 - e^{-\frac{w}{w_{\text{cr}}}} \right) \quad (\text{S8})$$

where  $\varepsilon_{\text{mem}}^f$  is fitting parameters that differ between laser-cut and blade-cut samples, and  $w_{\text{cr}}$  is likely correlated with the average nanofiber length  $\bar{L}$  or the average nodal spacing  $\bar{l}$  between fiber cross-junctions. Thus, we propose the relational form  $w_{\text{cr}} = D\bar{l}$ , where  $D$  is a cross-sectional topological factor related to the cutting technology (laser-cut samples exhibit a smaller  $D$ , indicating better ductility retention at narrow widths).

159 Finally, by substituting the intrinsic size effect formula (S8) into the simplified serpentine structure  
160 stretchability formula (S7), we derived the overall maximum applicable tensile strain of the  
161 structure:

$$162 \quad \varepsilon_{\text{app}} \leq \min \left( \sqrt{\frac{\varepsilon_{\text{mem}}^f R}{Gw}} \left( 1 - e^{-\frac{w}{w_{\text{cr}}}} \right), \frac{\theta}{1 - \cos \theta} - 1 \right) \quad (\text{S9})$$

163 This formula quantitatively links the fiber membrane's width-dependent intrinsic stretchability to  
164 the macroscopic deformability of the serpentine architecture, providing a predictive framework for  
165 designing high-performance stretchable ceramic devices.

166

167

**Supplementary Table S1.**

168

Recent advances in high-temperature sensors of diverse materials

| <b>Sensor type</b>       | <b>Working temperature</b> | <b>Max strain</b> | <b>Sensing parameters</b> | <b>References</b> |
|--------------------------|----------------------------|-------------------|---------------------------|-------------------|
| PDC based sensors        | < 600 °C                   | < 2%              | Single                    | 10,23,67          |
| Polymer sensors          | < 300 °C                   | > 50%             | Multi-parameter           | 19-22,27,68-71    |
| Alloy/Ceramic sensors    | > 800 °C                   | < 0.5%            | Single                    | 15-18,72-75       |
| Ceramic aerogels sensors | > 800 °C                   | < 2%              | Single                    | 24-26,31          |
| <b>SCAME</b>             | <b>&gt; 900 °C</b>         | <b>&gt; 50%</b>   | <b>4-parameters</b>       | <b>This work</b>  |

169

170

171

**Supplementary Table S2.**

172

Recent advances in high-temperature mechanical properties of thermal isolate aerogels.

|                                                 | <b>Materials</b>                                               | <b>Form</b> | <b>Compressive strain</b> | <b>Tensile strain</b>          | <b>Temp.</b>                         | <b>References</b> |
|-------------------------------------------------|----------------------------------------------------------------|-------------|---------------------------|--------------------------------|--------------------------------------|-------------------|
| <b>SiC-based Ceramic Aerogels</b>               | 3C-SiC nanowires                                               | bulk        | 76%                       | N/A                            | ~1500 °C                             | 30                |
|                                                 | SiC-SiO <sub>x</sub> bicrystal                                 | film~bulk   | 80%                       | 20%                            | -196 °C<br>~1200 °C                  | 35                |
|                                                 | SiC@SiO <sub>2</sub> nanowire aerogel                          | bulk        | 80%                       | N/A                            | ~1200 °C                             | 76                |
| <b>Carbon-based Aerogels</b>                    | Super-aligned carbon nanotubes                                 | 2 mm        | N/A                       | N/A                            | ~2600 °C in vacuum<br>1300 °C in air | 33                |
|                                                 | Carbide aerogels                                               | bulk        | 99%                       | N/A                            | -269 ~<br>2000 °C in vacuum          | 32                |
|                                                 | CNT Aerogel                                                    | N/A         | N/A                       | 220%                           | ~1344 °C                             | 29                |
|                                                 | Graphene aerogels                                              | ~2 mm       | 90%                       | 5% LE;<br>5400%<br>(patterned) | ~300 °C                              | 28                |
| <b>Nitride Aerogels</b>                         | Si <sub>3</sub> N <sub>4</sub> Nanofibrous AGs                 | bulk        | 80%                       | N/A                            | -196 °C ~<br>1200 °C                 | 77                |
|                                                 | hBN AGs                                                        | bulk        | 95%                       | N/A                            | 900 °C in air<br>1400 °C in vacuum   | 39                |
| <b>Oxide Ceramic Aerogels</b>                   | SiO <sub>2</sub> AGs                                           | bulk        | 80%                       | N/A                            | -196 °C ~<br>1100 °C                 | 78                |
|                                                 | ZrO <sub>2</sub> -Al <sub>2</sub> O <sub>3</sub> aerogels      | bulk        | 60%                       | N/A                            | ~1300 °C                             | 49                |
|                                                 | Al/Si aerogels                                                 | bulk        | 60%                       | 40%                            | -196 °C ~<br>1400 °C                 | 36                |
|                                                 | Y <sub>2</sub> Zr <sub>2</sub> O <sub>7</sub> fibrous membrane | 50 μm       | 60%                       | Foldable                       | ~1200 °C                             | 50                |
|                                                 | ZrO <sub>2</sub> -Al <sub>2</sub> O <sub>3</sub> nanofiber     | 10 ~ 700 μm | N/A                       | 2%                             | ~1400 °C                             | 79                |
| <b>Structurally Engineered Ceramic Aerogels</b> | Zig-zag architecture                                           | bulk        | 90%                       | 20%                            | ~1300 °C                             | 37                |
|                                                 | Highly-buckled nanofibrous                                     | bulk        | N/A                       | 80%                            | ~1000 °C                             | 34                |

173

174 **Supplementary Video 1. Infrared imaging videos of the SCAME on the flame of an alcohol**  
175 **lamp.**

176 The stretchable network of platinum-coated ceramic fibers reaches a maximum temperature of  
177 793 °C under an alcohol lamp flame, while retaining its flexibility without fracture or fusion  
178 failure.

179 **Supplementary Video 2. Video demonstrating the bidirectional SCAMs under cyclic tensile**  
180 **strain tests from 30% to 80%.**

181 The stretchable ceramic fiber network was subjected to cyclic tensile tests at strain from 30% to  
182 80% with an interval of 10% on a cyclic tensile testing machine. Fracture occurred only when  
183 the strain exceeded 80%.

184 **Supplementary Video 3. Optical and infrared imaging videos of the engine exhaust nozzle**  
185 **test integrated with SCAME.**

186 Heat flux sensor arrays are mounted on the nozzle inner and outer walls. Tests were recorded by  
187 an infrared thermal imager and an optical camera. Sensors acquired heat flux data during startup,  
188 preheating, ignition, acceleration, steady operation and shutdown. Reduced-size infrared footage  
189 and engine speed are presented on the right.

190

191 **References**

- 192 1 Wang, S. *et al.* Skin electronics from scalable fabrication of an intrinsically stretchable  
193 transistor array. *Nature* **555**, 83-88 (2018). <https://doi.org/10.1038/nature25494>  
194 2 Gates, B. D. Flexible Electronics. *Science* **323**, 1566-1567 (2009).  
195 <https://doi.org/10.1126/science.1171230>  
196 3 Jiang, S. *et al.* Flexible Metamaterial Electronics. *Adv Mater* **34**, e2200070 (2022).  
197 <https://doi.org/10.1002/adma.202200070>  
198 4 Wang, Y. *et al.* Electrically compensated, tattoo-like electrodes for epidermal  
199 electrophysiology at scale. *Sci. Adv.* **6**, eabd0996 (2020).  
200 <https://doi.org/10.1126/sciadv.abd0996>  
201 5 Yuan, J. *et al.* Skin-adaptive focused flexible micromachined ultrasound transducers for  
202 wearable cardiovascular health monitoring. *Sci. Adv.* **11**, eadw7632 (2025).  
203 <https://doi.org/10.1126/sciadv.adw7632>  
204 6 Park, K. *et al.* A biomimetic elastomeric robot skin using electrical impedance and  
205 acoustic tomography for tactile sensing. *Sci. Robot.* **7**, eabm7187 (2022).  
206 <https://doi.org/10.1126/scirobotics.abm7187>

- 207 7 Liu, F. *et al.* Neuro-inspired electronic skin for robots. *Sci. Robot.* **7**, eabl7344 (2022).  
208 <https://doi.org/10.1126/scirobotics.abl7344>
- 209 8 Liang, T., Liu, Z., Zhang, H., Zhou, X. & Liang, Y. The structure, material and performance  
210 of multi-functional tactile sensor and its application in robot field: A review. *Materials*  
211 *Today* **86**, 452-481 (2025). <https://doi.org/10.1016/j.mattod.2025.03.031>
- 212 9 Xiong, W. N. *et al.* Bio-inspired, intelligent flexible sensing skin for multifunctional flying  
213 perception. *Nano Energy* **90**, 106550 (2021).  
214 <https://doi.org/10.1016/j.nanoen.2021.106550>
- 215 10 Li, Y. *et al.* Flexible and Thermally Regulable High-Temperature Sensing Electronics.  
216 *Nano Lett* (2026). <https://doi.org/10.1021/acs.nanolett.6c00229>
- 217 11 Xiong, W. *et al.* Marangoni-driven deterministic formation of softer, hollow  
218 microstructures for sensitivity-enhanced tactile system. *Nat Commun* **15**, 5596 (2024).  
219 <https://doi.org/10.1038/s41467-024-49864-z>
- 220 12 Li, J. *et al.* AI-embodied multi-modal flexible electronic robots with programmable  
221 sensing, actuating and self-learning. *Nat Commun* **16**, 8818 (2025).  
222 <https://doi.org/10.1038/s41467-025-63881-6>
- 223 13 Liu, W. *et al.* Flexible solar cells based on foldable silicon wafers with blunted edges.  
224 *Nature* **617**, 717-723 (2023). <https://doi.org/10.1038/s41586-023-05921-z>
- 225 14 Liu, S. *et al.* Conformability of flexible sheets on spherical surfaces. *Sci Adv* **9**, eadf2709  
226 (2023). <https://doi.org/10.1126/sciadv.adf2709>
- 227 15 Yang, M. M. *et al.* A Strain-Temperature Integrated Polymer-Derived SiCN Ceramic High  
228 Temperature Sensor with Wide-Range and Ultra-Short Response Time. *Advanced*  
229 *Functional Materials* **34**, 2400400 (2024). <https://doi.org/10.1002/adfm.202400400>
- 230 16 Wu, C. *et al.* Innovative coaxial high-temperature thin-film sensor with core-shell  
231 structure surpassing traditional multilayer films. *Rare Metals* **43**, 3854-3867 (2024).  
232 <https://doi.org/10.1007/s12598-023-02612-6>
- 233 17 Fan, X. *et al.* Indium oxide doped with zirconium oxide thin film thermocouple with a  
234 temperature upper limit of 1600 °C. *Ceramics International* **51**, 39328-39336 (2025).  
235 <https://doi.org/10.1016/j.ceramint.2025.06.170>
- 236 18 Chang, Y. *et al.* Performance improvement of NiO/YSZ sensitive electrode for high  
237 temperature electrochemical NO<sub>x</sub> gas sensors. *Ceramics International* **50**, 39347-39357  
238 (2024). <https://doi.org/10.1016/j.ceramint.2024.07.307>
- 239 19 Liu, H. *et al.* Lightweight, Superelastic, and Hydrophobic Polyimide Nanofiber /MXene  
240 Composite Aerogel for Wearable Piezoresistive Sensor and Oil/Water Separation  
241 Applications. *Advanced Functional Materials* **31** (2021).  
242 <https://doi.org/10.1002/adfm.202008006>
- 243 20 Liu, Z. *et al.* A thin-film temperature sensor based on a flexible electrode and substrate.  
244 *Microsyst Nanoeng* **7**, 42 (2021). <https://doi.org/10.1038/s41378-021-00271-0>
- 245 21 Liu, J. M., Weng, L., Zhang, X. R., Wang, X. M. & Wu, Z. J. Intrinsic fiber reinforced  
246 polyimide aerogel flexible strain sensor applied in high-temperature environment. *Nano*  
247 *Research* **18**, 94907302 (2025). <https://doi.org/10.26599/Nr.2025.94907302>
- 248 22 Ma, Z. *et al.* Permeable superelastic liquid-metal fibre mat enables biocompatible and  
249 monolithic stretchable electronics. *Nat Mater* **20**, 859-868 (2021).  
250 <https://doi.org/10.1038/s41563-020-00902-3>

- 251 23 Li, W. *et al.* Highly customizable, ultrawide-temperature free-form flexible sensing  
252 electronic systems based on medium-entropy alloy paintings. *Nat Commun* **16**, 7351  
253 (2025). <https://doi.org/10.1038/s41467-025-62100-6>
- 254 24 Guo, Y. S. *et al.* Large-Scale Synthesis of Flexible Cermet Interdigital Electrodes with  
255 Stable Ceramic-Metal Contact for Fire-Resistant Pressure Tactile Sensors. *Advanced*  
256 *Functional Materials* **34** (2024). <https://doi.org/10.1002/adfm.202313645>
- 257 25 Liu, Z. *et al.* Flexible temperature sensor with high sensitivity ranging from liquid  
258 nitrogen temperature to 1200 °C. *International Journal of Extreme Manufacturing* **5**  
259 (2022). <https://doi.org/10.1088/2631-7990/aca44d>
- 260 26 Huang, Y. *et al.* High-temperature flexible heat flux sensors. *Chemical Engineering*  
261 *Journal* **504**, 158986 (2025). <https://doi.org/10.1016/j.cej.2024.158986>
- 262 27 Pang, K. *et al.* Hydroplastic foaming of graphene aerogels and artificially intelligent  
263 tactile sensors. *Sci Adv* **6**, eabd4045 (2020). <https://doi.org/10.1126/sciadv.abd4045>
- 264 28 Wu, M. *et al.* Superelastic graphene aerogel-based metamaterials. *Nat Commun* **13**,  
265 4561 (2022). <https://doi.org/10.1038/s41467-022-32200-8>
- 266 29 Aliev, A. E. *et al.* Giant-stroke, superelastic carbon nanotube aerogel muscles. *Science*  
267 **323**, 1575-1578 (2009). <https://doi.org/10.1126/science.1168312>
- 268 30 Su, L. *et al.* Ultralight, Recoverable, and High-Temperature-Resistant SiC Nanowire  
269 Aerogel. *ACS Nano* **12**, 3103-3111 (2018). <https://doi.org/10.1021/acsnano.7b08577>
- 270 31 Yang, T. *et al.* Strong yet Flexible TiC-SiC Fibrous Membrane with Long-Time Ultrahigh  
271 Temperature Resistance for Sensing in Extreme Environment. *Nanomicro Lett* **18**, 177  
272 (2026). <https://doi.org/10.1007/s40820-025-02019-1>
- 273 32 Pang, K. *et al.* Dome-celled aerogels with ultrahigh-temperature superelasticity over  
274 2273 K. *Science* **389**, 290-294 (2025). <https://doi.org/10.1126/science.adw5777>
- 275 33 Yuan, Z. *et al.* Carbon Nanostructure-Enabled High-Performance Thermal Insulation for  
276 Extreme-Temperature Application. *Advanced Functional Materials* **36**, e14142 (2026).  
277 <https://doi.org/10.1002/adfm.202514142>
- 278 34 Dang, S. *et al.* Highly-Buckled Nanofibrous Ceramic Aerogels with Ultra-Large  
279 Stretchability and Tensile-Insensitive Thermal Insulation. *Adv Mater* **37**, e2415159  
280 (2025). <https://doi.org/10.1002/adma.202415159>
- 281 35 Su, L. *et al.* Highly Stretchable, Crack-Insensitive and Compressible Ceramic Aerogel. *ACS*  
282 *Nano* **15**, 18354-18362 (2021). <https://doi.org/10.1021/acsnano.1c07755>
- 283 36 Cheng, X., Liu, Y. T., Si, Y., Yu, J. & Ding, B. Direct synthesis of highly stretchable ceramic  
284 nanofibrous aerogels via 3D reaction electrospinning. *Nat Commun* **13**, 2637 (2022).  
285 <https://doi.org/10.1038/s41467-022-30435-z>
- 286 37 Guo, J. R. *et al.* Hypocrystalline ceramic aerogels for thermal insulation at extreme  
287 conditions. *Nature* **606**, 909-+ (2022). <https://doi.org/10.1038/s41586-022-04784-0>
- 288 38 Xu, X. *et al.* Elastic ceramic aerogels for thermal superinsulation under extreme  
289 conditions. *Materials Today* **42**, 162-177 (2021).  
290 <https://doi.org/10.1016/j.mattod.2020.09.034>
- 291 39 Xu, X. *et al.* Double-negative-index ceramic aerogels for thermal superinsulation. *Science*  
292 **363**, 723-727 (2019). <https://doi.org/10.1126/science.aav7304>
- 293 40 Hu, Y. *et al.* Bio-inspired cellular aerogel fibers integrating high mechanical strength and  
294 softness for thermal insulation textiles. *Nat Commun* (2026).  
295 <https://doi.org/10.1038/s41467-026-71723-2>

- 296 41 Su, L. *et al.* A review on the emerging resilient and multifunctional ceramic aerogels.  
297 *Journal of Materials Science & Technology* **75**, 1-13 (2021).  
298 <https://doi.org/10.1016/j.jmst.2020.10.018>
- 299 42 Wang, S. *et al.* Nitrogen-Doped Magnetic-Dielectric-Carbon Aerogel for High-Efficiency  
300 Electromagnetic Wave Absorption. *Nanomicro Lett* **16**, 16 (2023).  
301 <https://doi.org/10.1007/s40820-023-01244-w>
- 302 43 Su, L. *et al.* Anisotropic and hierarchical SiC@SiO<sub>2</sub> nanowire aerogel with exceptional  
303 stiffness and stability for thermal superinsulation. *Sci. Adv.* **6**, eaay6689 (2020).  
304 <https://doi.org/10.1126/sciadv.aay6689>
- 305 44 Meng, S. *et al.* AlN-based aerogel thermo-cooler enabled by enhanced phonon  
306 conduction and unconstrained liquid capillarity. *Nat Commun* **16**, 11068 (2025).  
307 <https://doi.org/10.1038/s41467-025-65983-7>
- 308 45 Bombarda, I., Sitzmann, C., Liensdorf, T., Langhof, N. & Schafföner, S. Tensile testing of  
309 Ytria-stabilized zirconia ceramic tapes for solid oxide cells. *International Journal of*  
310 *Hydrogen Energy* **50**, 492-500 (2024). <https://doi.org/10.1016/j.ijhydene.2023.08.258>
- 311 46 Tung Le, V., Parolini, N., Shih, C. & Singh, A. K. Interlaminar tensile strength of Alumina-  
312 Based Oxide/Oxide ceramic matrix composite at room temperature and 1200 °C using  
313 diametral compression test method. *Composites Part A: Applied Science and*  
314 *Manufacturing* **186** (2024). <https://doi.org/10.1016/j.compositesa.2024.108420>
- 315 47 Zhang, Y. *et al.* Buckling in serpentine microstructures and applications in elastomer-  
316 supported ultra-stretchable electronics with high areal coverage. *Soft Matter* **9**, 8062-  
317 8070 (2013). <https://doi.org/10.1039/C3SM51360B>
- 318 48 Widlund, T., Yang, S. X., Hsu, Y. Y. & Lu, N. S. Stretchability and compliance of  
319 freestanding serpentine-shaped ribbons. *Int J Solids Struct* **51**, 4026-4037 (2014).  
320 <https://doi.org/10.1016/j.ijsolstr.2014.07.025>
- 321 49 Zhang, X. *et al.* Ultrastrong, Superelastic, and Lamellar Multiarch Structured ZrO(2)-  
322 Al(2)O(3) Nanofibrous Aerogels with High-Temperature Resistance over 1300 degrees C.  
323 *ACS Nano* **14**, 15616-15625 (2020). <https://doi.org/10.1021/acsnano.0c06423>
- 324 50 Xie, Y. S. *et al.* High temperature and high strength Y<sub>2</sub>Zr<sub>2</sub>O<sub>7</sub> flexible fibrous membrane  
325 for efficient heat insulation and acoustic absorption. *Chemical Engineering Journal* **416**  
326 (2021). <https://doi.org/10.1016/j.cej.2021.128994>
- 327 51 Garnett, E. C. *et al.* Self-limited plasmonic welding of silver nanowire junctions. *Nat*  
328 *Mater* **11**, 241-249 (2012). <https://doi.org/10.1038/nmat3238>
- 329 52 Xie, X., Zheng, Z., Wang, X. & Lee Kaplan, D. Low-Density Silk Nanofibrous Aerogels:  
330 Fabrication and Applications in Air Filtration and Oil/Water Purification. *ACS Nano* **15**,  
331 1048-1058 (2021). <https://doi.org/10.1021/acsnano.0c07896>
- 332 53 Heidarian, P. *et al.* Poly(3-Hydroxybutyrate-co-3-Hydroxyvalerate) Self-Reinforced  
333 Composites via Solvent-Induced Interfiber Welding of Nanofibers. *Biomacromolecules*  
334 **25**, 5039-5047 (2024). <https://doi.org/10.1021/acs.biomac.4c00441>
- 335 54 Jia, X. *et al.* Ultrafast laser welding of transparent materials: from principles to  
336 applications. *International Journal of Extreme Manufacturing* **7**, 032001 (2025).  
337 <https://doi.org/10.1088/2631-7990/ada7a7>
- 338 55 Zhang, L. *et al.* Ceramic nanowelding. *Nat Commun* **9**, 96 (2018).  
339 <https://doi.org/10.1038/s41467-017-02590-1>

- 340 56 Zhang, Y. *et al.* Laser Micro/Nano-Structuring Pushes Forward Smart Sensing:  
341 Opportunities and Challenges. *Advanced Functional Materials* **33**, 2211272 (2023).  
342 <https://doi.org/https://doi.org/10.1002/adfm.202211272>
- 343 57 Liu, Z. *et al.* Flexible temperature sensor with high sensitivity ranging from liquid  
344 nitrogen temperature to 1200 °C. *International Journal of Extreme Manufacturing* **5**,  
345 015601 (2023). <https://doi.org/10.1088/2631-7990/aca44d>
- 346 58 Li, H. *et al.* Breathable and Skin-Conformal Electronics with Hybrid Integration of  
347 Microfabricated Multifunctional Sensors and Kirigami-Structured Nanofibrous  
348 Substrates. *Advanced Functional Materials* **32** (2022).  
349 <https://doi.org/10.1002/adfm.202202792>
- 350 59 Liu, H. *et al.* Robust and Multifunctional Kirigami Electronics with a Tough and  
351 Permeable Aramid Nanofiber Framework. *Adv Mater* **34**, e2207350 (2022).  
352 <https://doi.org/10.1002/adma.202207350>
- 353 60 Fu, M. *et al.* A Highly Sensitive, Reliable, and High-Temperature-Resistant Flexible  
354 Pressure Sensor Based on Ceramic Nanofibers. *Adv Sci* **7**, 2000258 (2020).  
355 <https://doi.org/https://doi.org/10.1002/advs.202000258>
- 356 61 Chen, Z. *et al.* A superelastic SiOC@carbon ceramic spring for multifunctional pressure  
357 sensor in wide temperature range. *Chemical Engineering Journal* **468**, 143635 (2023).  
358 <https://doi.org/https://doi.org/10.1016/j.cej.2023.143635>
- 359 62 Guo, Y. *et al.* Large-Scale Synthesis of Flexible Cermet Interdigital Electrodes with Stable  
360 Ceramic-Metal Contact for Fire-Resistant Pressure Tactile Sensors. *Advanced Functional*  
361 *Materials* **34**, 2313645 (2024). <https://doi.org/https://doi.org/10.1002/adfm.202313645>
- 362 63 Fu, X. *et al.* High-Temperature Heat Flux Sensor Based on Tungsten–Rhenium Thin-Film  
363 Thermocouple. *Ieee Sens J* **20**, 10444-10452 (2020).  
364 <https://doi.org/10.1109/JSEN.2020.2993592>
- 365 64 Mane, S. M., Liechti, K. M. & Huang, R. A numerical study on tensile strength of low-  
366 density Kagome networks made of brittle fibers. *Int J Solids Struct* **302**, 112987 (2024).  
367 <https://doi.org/10.1016/j.ijsolstr.2024.112987>
- 368 65 Mane, S., Khabaz, F., Bonnacaze, R. T., Liechti, K. M. & Huang, R. A numerical study on  
369 elastic properties of low-density two-dimensional networks of crosslinked long fibers.  
370 *Int J Solids Struct* **230**, 111164 (2021). <https://doi.org/10.1016/j.ijsolstr.2021.111164>
- 371 66 Xue, Z., Song, H., Rogers, J. A., Zhang, Y. & Huang, Y. Mechanically-Guided Structural  
372 Designs in Stretchable Inorganic Electronics. *Adv Mater* **32**, e1902254 (2020).  
373 <https://doi.org/10.1002/adma.201902254>
- 374 67 Yang, C. *et al.* A Flexible Strain Sensor of Ba(Ti, Nb)O/Mica with a Broad Working  
375 Temperature Range. *Advanced Materials Technologies* **4**, 1900578 (2019).  
376 <https://doi.org/10.1002/admt.201900578>
- 377 68 Xiang, S. F., Chen, S. S., Yao, M. T., Zheng, F. & Lu, Q. H. Strain sensor based on a flexible  
378 polyimide ionogel for application in high- and low-temperature environments. *Journal of*  
379 *Materials Chemistry C* **7**, 9625-9632 (2019). <https://doi.org/10.1039/c9tc02719j>
- 380 69 He, H. *et al.* Hybrid assembly of polymeric nanofiber network for robust and  
381 electronically conductive hydrogels. *Nat Commun* **14**, 759 (2023).  
382 <https://doi.org/10.1038/s41467-023-36438-8>

- 383 70 Zeng, Y. Q. *et al.* Thermally Conductive Reduced Graphene Oxide Thin Films for Extreme  
384 Temperature Sensors. *Advanced Functional Materials* **29**, 1901388 (2019).  
385 <https://doi.org/10.1002/adfm.201901388>
- 386 71 Xu, H. *et al.* An ultra-stretchable, highly sensitive and biocompatible capacitive strain  
387 sensor from an ionic nanocomposite for on-skin monitoring. *Nanoscale* **11**, 1570-1578  
388 (2019). <https://doi.org/10.1039/c8nr08589g>
- 389 72 Wu, C. *et al.* Multilayer co-sintered Pt thin-film strain gauge for high-temperature  
390 applications. *Surface & Coatings Technology* **459**, 129380 (2023).  
391 <https://doi.org/10.1016/j.surfcoat.2023.129380>
- 392 73 Liu, H. *et al.* High temperature static and dynamic strain response of PdCr thin film strain  
393 gauge prepared on Ni-based superalloy. *Sensor Actuat a-Phys* **298**, 111571 (2019).  
394 <https://doi.org/10.1016/j.sna.2019.111571>
- 395 74 He, J. *et al.* High-temperature strain sensor based on sapphire fiber Bragg grating. *Opt*  
396 *Lett* **49**, 446-449 (2024). <https://doi.org/10.1364/OL.509397>
- 397 75 Xu, L. *et al.* Rapid laser fabrication of indium tin oxide and polymer-derived ceramic  
398 composite thin films for high-temperature sensors. *J Colloid Interface Sci* **658**, 913-922  
399 (2024). <https://doi.org/10.1016/j.jcis.2023.12.119>
- 400 76 Su, L. *et al.* Anisotropic and hierarchical SiC@SiO(2) nanowire aerogel with exceptional  
401 stiffness and stability for thermal superinsulation. *Sci Adv* **6**, eaay6689 (2020).  
402 <https://doi.org/10.1126/sciadv.aay6689>
- 403 77 Tong, Z. *et al.* Si(3)N(4) Nanofibrous Aerogel with In Situ Growth of SiO(x) Coating and  
404 Nanowires for Oil/Water Separation and Thermal Insulation. *ACS Appl Mater Interfaces*  
405 **13**, 22765-22773 (2021). <https://doi.org/10.1021/acsami.1c05575>
- 406 78 Dou, L. *et al.* Hierarchical Cellular Structured Ceramic Nanofibrous Aerogels with  
407 Temperature-Invariant Superelasticity for Thermal Insulation. *ACS Appl Mater Interfaces*  
408 **11**, 29056-29064 (2019). <https://doi.org/10.1021/acsami.9b10018>
- 409 79 Chen, D. C. *et al.* Superdurable, Flexible Ceramic Nanofibers for Sustainable Passive  
410 Radiative Cooling. *ACS Nano* **19**, 28280-28294 (2025).  
411 <https://doi.org/10.1021/acsnano.5c05958>
- 412
